# Supplementary material for: Targeted and Untargeted Mass Spectrometry-Based Metabolomics for Chemical Profiling of Three Coffee Species
Source: MDPI journal article supplement (doi:10.3390/molecules27103152), 2022-05-14
Supplement: s1 [file s1]

# Targeted and untargeted mass spectrometry-based metabolomics for chemical profiling of three coffee species

Andrea Montis <sup>1,2,\*</sup>, Florence Souard <sup>3,4</sup>, Cédric Delporte <sup>1,2</sup>, Piet Stoffelen <sup>5</sup>, Caroline Stévigny <sup>1</sup>, Pierre Van Antwerpen <sup>1,2</sup>

<sup>1</sup> RD3 Unit of Pharmacognosy, Bioanalysis and Drug Discovery, Faculty of Pharmacy, Université libre de Bruxelles, Campus Plaine, CP 205/09, 1050 Brussels, Belgium; cedric.delporte@ulb.be (C.D.); caroline.stevigny@ulb.be (C.S.); pierre.van.antwerpen@ulb.be (P.V.A.)

<sup>2</sup> APFP Analytical platform of the Faculty of Pharmacy, Faculty of Pharmacy, Université libre de Bruxelles, Campus Plaine, CP 205/5, 1050 Brussels, Belgium

<sup>3</sup> Département de Pharmacochimie Moléculaire, UMR 5063 CNRS, Université Grenoble Alpes, 470 rue de la chimie, 38400 Saint-Martin d'Hères, France; florence.souard@ulb.be (F.S.)

<sup>4</sup> DPP Department – Unit of Pharmacology, Pharmacotherapy and Pharmaceutical care, Faculty of Pharmacy, Université libre de Bruxelles, Campus Plaine, CP 205/5, 1050 Brussels, Belgium

<sup>5</sup> Meise Botanic Garden, Domein van Bouchout, Nieuwe laan 38, 1860 Meise, Belgium; [piet.stoffelen@plantentuinmeise.be](mailto:piet.stoffelen@plantentuinmeise.be) (P.S.)

\* Correspondence: [Andrea.Montis@ulb.be](mailto:Andrea.Montis@ulb.be) (A.M.)

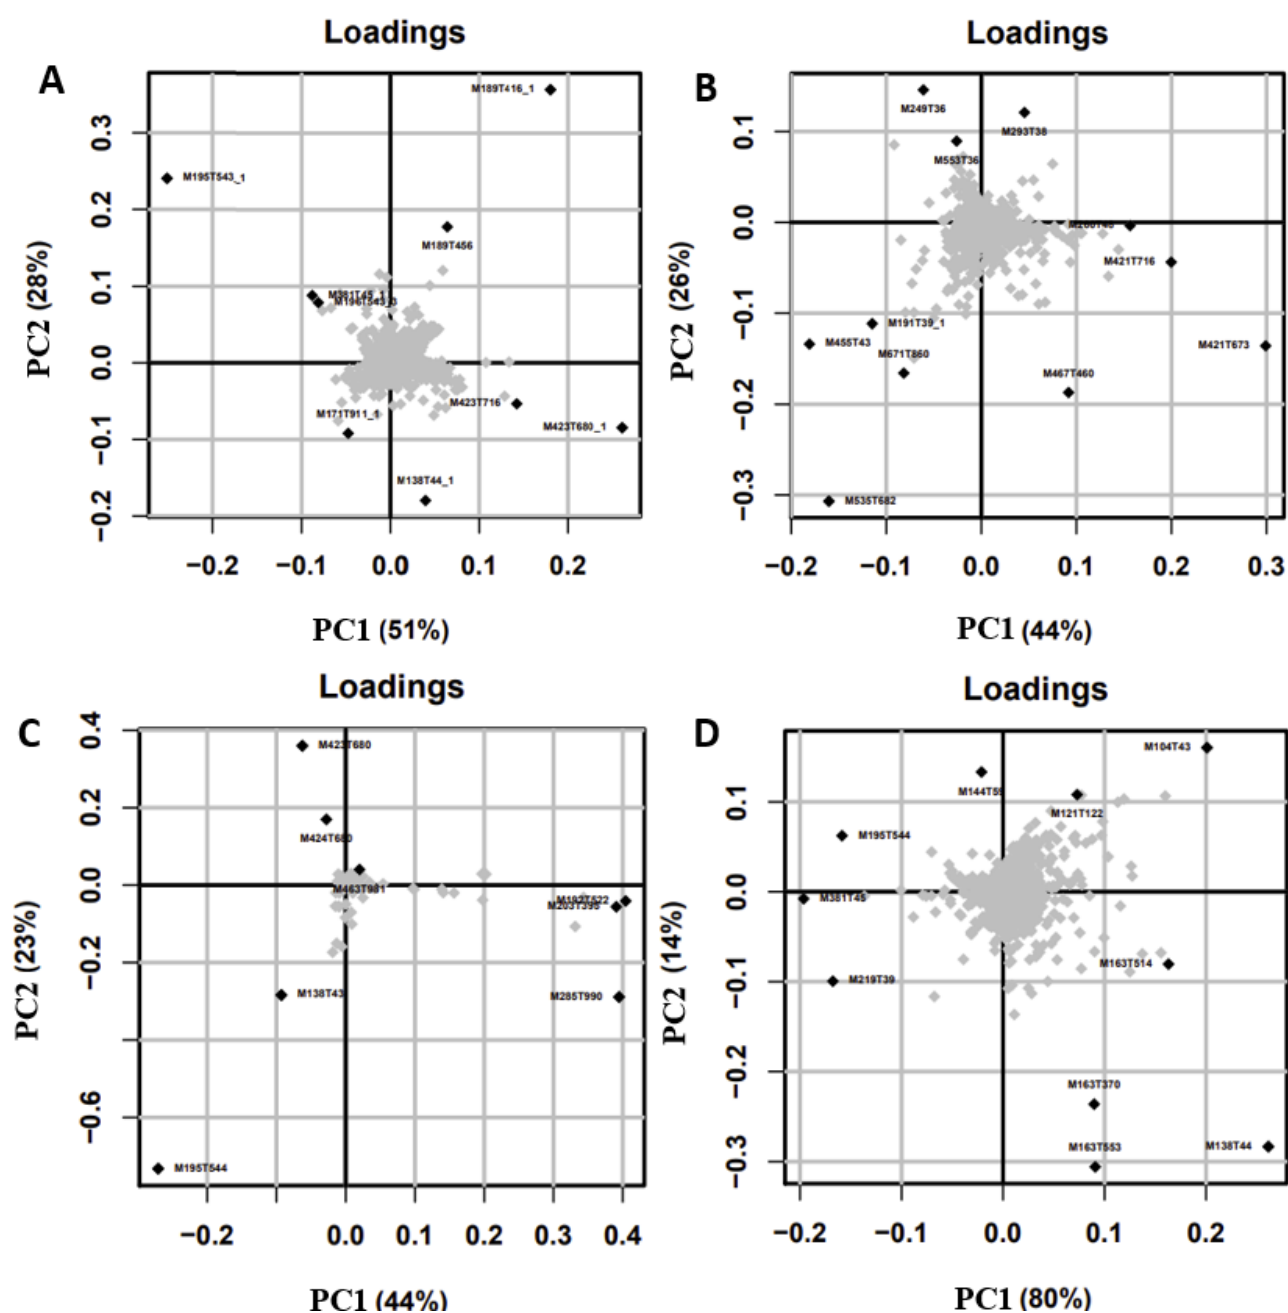

**Figure S1.** Loading plots showing the main metabolites responsible of the inter-species separation for the leaves analysed in ESI-MS (+) mode (**1A**), the leaves in ESI-MS (-) mode (**1B**), the phloem sap in ESI-MS (+) (**1C**), and the fruits in ESI-MS (+) (**1D**).

**Table S1.** List of the main annotated metabolites: caffeine, chlorogenic acids, benzophenone and xanthone derivatives.

| RT (s) | m/z      | Ion type  | Name                                | Ion formula          | $\Delta$ ppm |
|--------|----------|-----------|-------------------------------------|----------------------|--------------|
| 542    | 195.0874 | $[M+H]^+$ | caffeine                            | $C_8H_{11}N_4O_2$    | -1.30        |
| 513    | 355.1025 | $[M+H]^+$ | 5-CQA                               | $C_{16}H_{19}O_9$    | 0.40         |
| 578    | 353.0888 | $[M-H]^-$ |                                     | $C_{16}H_{17}O_9$    | 2.81         |
| 553    | 355.1020 | $[M+H]^+$ | 4-CQA                               | $C_{16}H_{19}O_9$    | -1.01        |
| 626    | 353.0887 | $[M-H]^-$ |                                     | $C_{16}H_{17}O_9$    | 2.53         |
| 370    | 355.1022 | $[M+H]^+$ | 3-CQA                               | $C_{16}H_{19}O_9$    | -0.45        |
| 461    | 353.0890 | $[M-H]^-$ |                                     | $C_{16}H_{17}O_9$    | 3.37         |
| 681    | 367.1044 | $[M-H]^-$ | 5-FQA                               | $C_{17}H_{19}O_9$    | 2.57         |
| 759    | 367.1044 | $[M-H]^-$ | 4-FQA                               | $C_{17}H_{19}O_9$    | 2.57         |
| 504    | 367.1038 | $[M-H]^-$ | 3-FQA                               | $C_{17}H_{19}O_9$    | 0.94         |
| 513    | 337.0918 | $[M+H]^+$ | caffeoylshikimic acid               | $C_{16}H_{17}O_8$    | -0.01        |
| 560    | 517.1549 | $[M+H]^+$ | Glucopyranosyl-CQA                  | $C_{22}H_{29}O_{14}$ | -0.43        |
| 680    | 423.0921 | $[M+H]^+$ | mangiferin                          | $C_{19}H_{19}O_{11}$ | -0.21        |
| 673    | 421.0802 | $[M-H]^-$ |                                     | $C_{19}H_{17}O_{11}$ | 6.08         |
| 716    | 421.0799 | $[M-H]^-$ | isomangiferin                       | $C_{19}H_{17}O_{11}$ | 5.37         |
| 746    | 437.1078 | $[M+H]^+$ | homomangiferin                      | $C_{20}H_{21}O_{11}$ | -0.09        |
| 738    | 435.0946 | $[M-H]^-$ |                                     | $C_{20}H_{19}O_{11}$ | 3.02         |
| 605    | 585.1450 | $[M+H]^+$ | neomangiferin                       | $C_{25}H_{29}O_{16}$ | -0.02        |
| 589    | 583.1322 | $[M-H]^-$ |                                     | $C_{25}H_{27}O_{16}$ | 2.98         |
| 498    | 843.1609 | $[M+H]^+$ | tetrahydroxanthone-c-hexoside dimer | $C_{38}H_{35}O_{22}$ | -0.65        |
| 491    | 841.1480 | $[M-H]^-$ |                                     | $C_{38}H_{33}O_{22}$ | 1.31         |
| 420    | 393.1182 | $[M+H]^+$ | garcimangosone D                    | $C_{19}H_{21}O_9$    | -0.49        |
| 391    | 391.1048 | $[M-H]^-$ |                                     | $C_{19}H_{19}O_9$    | 3.43         |
| 551    | 571.1655 | $[M+H]^+$ | iriflophenone-di-O,C-hexoside       | $C_{25}H_{31}O_{15}$ | -0.43        |
| 537    | 569.1521 | $[M-H]^-$ |                                     | $C_{25}H_{29}O_{15}$ | 1.59         |
